# Supplementary material
Source: PubMed Central journal article supplement (PMC5373491)
Supplement: NIHMS830449-supplement-Supplemental_Digital_Content_1.pdf [file NIHMS830449-supplement-Supplemental_Digital_Content_1.pdf]

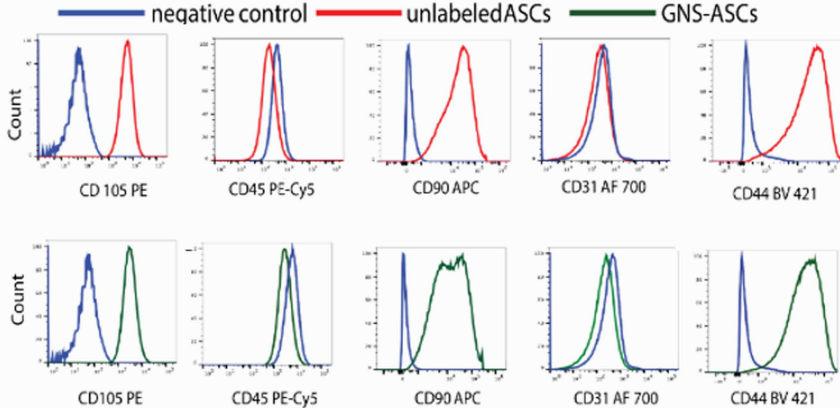

### MTT Assay

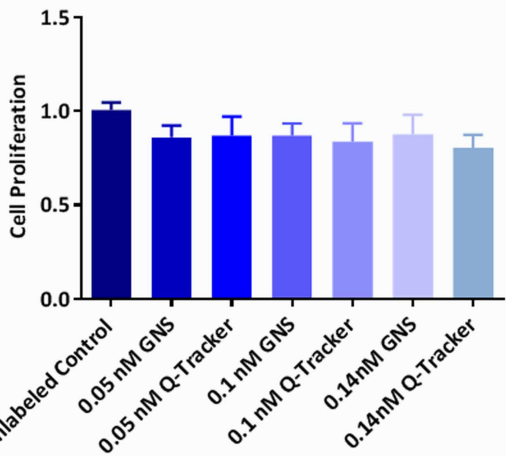

### Trypan Blue Viability Assay

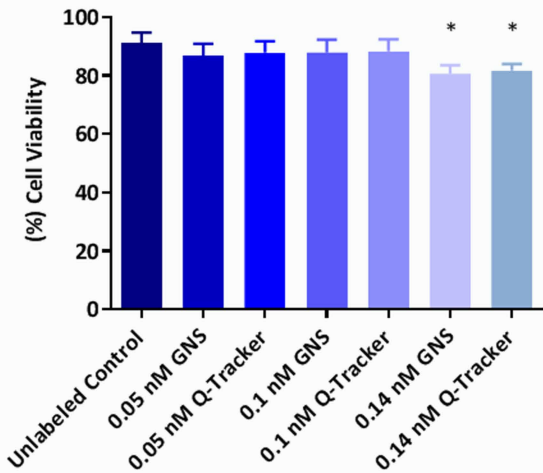

**Supplemental Digital Content 1:** Figure shows effects of GNSs on ASC phenotype, viability, and proliferation. Immunophenotype of ASCs compared with GNS-labeled ASCs (*top*). ASCs without gold nanostars were compared with GNS-labeled ASCs. Flow cytometric analyses demonstrated that following cytoplasmic localization of GNSs, ASCs were phenotypically unaltered and maintained expression of CD105, CD90, and CD44. They were negative for hematopoietic cell markers CD45 and CD31. *Blue line*, negative control; *red line*, antibody expression on unlabeled ASCs; *green line*, antibody expression on GNS-labeled ASCs. Cell counts were normalized to the mode. MTT proliferation assay (*bottom left*) and trypan blue viability assay (*bottom right*) following a 24-hour incubation with increasing concentrations of GNSs and Qtracker. There was no significant effect on cellular proliferation as shown by the MTT assay, although trypan blue showed a significant decrease in cell viability when using concentrations of 0.14nM of both GNSs and Qtracker.
